# Supplementary material for: Content quality and reliablity of YouTube™ videos as a source of information about good oral hygiene practices in adults
Source: PeerJ. 2024 Sep 25;12:e18183. doi: 10.7717/peerj.18183 (PMC11438441; doi:10.7717/peerj.18183)
Supplement: Supplemental Information 1 [file peerj-12-18183-s001.xlsx]

## Sheet: Video characteristics
Video URL	Duration	Source of the Video	Number of views	Number of likes	Number of dislikes	Interaction index	Comments	Total content score	DISCERN	GQS
watch?v=2yxa67n5JR4	10 min 53 sec	Dental Faculty	57000	671	0	1.17719	Turned off	7	2	3
watch?v=6r3FW_LDj8U	4 min 26 sec	Dental Hygienist	124000	43000	0	34.6774	166	10	4	4
watch?v=6xcmQBGfphE	3 min 10 sec.	Periodontist	12000	298	0	2.48333	15	6	4	4
watch?v=AVsMmppYXrI	8 min 25 sec.	Private Healthcare center	199000	430	0	0.21608	4	7	4	4
watch?v=nhzl2nFt10g	1min 12 sec.	Dental clinic	528	3	0	0.568182	0	5	4	4
watch?v=4AU2Abxw-00	9 min 17 sec	Dentist	57000	214	0	0.375439	12	10	5	5
watch?v=MrfIaVs_dAQ	13 min 19 sec.	Dentist	13000	38	0	0.292308	17	9	3	5
watch?v=ibwMhDQJInY	2 min 11 sec.	Private Healthcare center	96000	518	0	0.539583	13	5	2	2
watch?v=VJcbGEKCQgk	10 min. 35 sec	Dentist	51000	1700	0	3.33333	306	10	4	5
watch?v=7k3wjTOhYwY	29 min 10 sec	Dentist	1400000	18000	0	1.28571	951	9	0	4
watch?v=-hR5GNqLKbc	9 min 56 sec	Dental Hygienist/ Dentist	300000	6400	0	2.13333	361	12	4	5
watch?v=yC6qapmO9Wc	11 min 31 sec	Dentist	50000	1200	0	2.4	93	7	2	3
watch?v=4LACyvMPKwk	4 min	Dental Hygienist	116000	1900	0	1.63793	104	7	4	4
watch?v=FFq-2aA6m8Y&t=27s	3 min 36 sec	Dental Hygienist	239000	6700	0	2.80335	242	13	5	5
watch?v=rU9ZvXhoZ1Q watch?v=IAR8VEmShfo	6 min 29 sec	Dental Hygienist	568000	11200	0	1.97183	638	7	4	4
watch?v=IHwGztslvB8	29 min 56 sec	Periodontist	7300	118	0	1.61644	4	10	5	5
watch?v=dp23sQ6MNvs&t=86s	3 min 54 sec	Dental clinic	67000	929	0	1.38657	28	10	4	5
watch?v=UYRO9R6Bw2s	4 min 18 sec	Private education center	222852	2100	0	0.942329	124	5	2	5
watch?v=fv-EGsNvNzc	1 min 22 sec	tv channel	140000	607	0	0.433571	40	5	2	2
watch?v=9fI_hEz2oM0	1 min 58 sec	WHO	27000	32	0	0.118519	0	3	1	2
watch?v=uAKFKIFrx58	2 min 35 sec	Dentist	4000	13	0	0.325	0	4	2	2
watch?v=ajwIU957QHA	2 min 07 sec	Dental Faculty	98000	100	0	0.102041	4	7	2	2
watch?v=howz59V8318	9 min 50 sec	Prosthodontist	36000	891	0	2.475		7	3	4
watch?v=UU_IfVFV6fU watch?v=f5OuzrHYQ7s	15 min 40 sec 12 min 33 sec	Dentist	51000	590	0	1.15686	33	10	5	4
watch?v=fHXOPun1cOs&t=14s	4 min 53 sec	Online dental platform	33000000	9800	0	0.029697	950	3	1	5
watch?v=YEz6s71KxBs	9 min	Laypeople	4154358	68000	0	1.63684	5800	9	3	4
watch?v=ds9sWQNHo7k watch?v=EvsrhZm98r4&t=0s	15 min 42 sec	Dentist	172000	3700	0	2.15116	606	11	5	4
watch?v=vMp1l3E0h0g	8 min 19 sec	Laypeople	879000	14000	0	1.59272	668	6	2	3
watch?v=VJcbGEKCQgk&t=27s	10 min 35 sec	Dentist	53000	1700	0	3.20755	308	10	3	3
watch?v=ylZZOeq2EPQ	1 min 29 sec	Hospital	145000	1000	0	0.689655	11	5	2	4
watch?v=Oq2vQSkVQxY	1 min 56 sec	Dental clinic	3500	18000	0	514.286	1454	7	3	3
watch?v=aFl1OwR-z0Y	16 min 11 sec	Dentist	3400	36	0	1.05882	2	7	0	4
watch?v=hqnTHyv52IQ	10 min 21 sec	Dentist	539000	17000	0	3.15399	605	5	2	2
watch?v=0MTbQMwxxWk	11 min 14 sec	Dental Hygienist	39000	1700	0	4.35897	67	5	1	2
watch?v=mlQhMPKJThM	55 sec	Dentist	56	0	0	0	56	3	2	2
watch?v=RWEEPSWT3mI	3 min	Laypeople	459000	12000	0	2.61438	322	7	2	2
watch?v=uZWSJZD6_sM	9 min 41 sec	Laypeople	13000	532		4.09231	39	5	2	2
watch?v=BapR9J86ZZw	2 min 11 sec	National Health Service	5900000	50000	0	0.847458	Turned off	5	3	3
watch?v=-b5VTkwcnkk	12 min 33 sec	Dentist	186	10	0	5.37634	0	7	5	4
watch?v=leVF5RYj42Y watch?v=noExCv6n2oc	5 min 7 sec	Dental Hygienist	588000	3900	0	0.663265	210	7	4	4
watch?v=tBDx38Mag7A	2 min 23 sec	Dental clinic	522000	4200	0	0.804598	253	6	3	3
watch?v=6mhRTDBNQ-M watch?v=91EFqX2Czl8&t=1s	15 min 30 sec	Dentist	1558000	30808	0	1.97741	1214	5	4	4
watch?v=sxT6Xz6T7DY watch?v=28CNn14yIvw watch?v=4P2NhkIqsqg	8 min 36 sec	Dentist	690000	7900	0	1.14493	683	5	4	4
watch?v=3XtVgZ8GSP0	4 min 47 sec	Dental Hygienist	35000	1300		3.71429	87	7	3	4
watch?v=eUZZOBBJRaI	6 min 35 sec	Dental Hygienist	494000	12000	0	2.42915	662	8	4	4
watch?v=FLNUoprv0og	11 min 30 sec	Dentist	306000	6500	0	2.12418	347	5	3	3
watch?v=KVOohhi3xcY	9 min 52 sec	Dentist	218000	5600	0	2.56881	211	5	2	2
watch?v=tobt-klsltg	12 min 53 sec	Periodontist	369664	6000	0	1.6231	292	6	3	4
watch?v=621E6KyWIGA	2 min	Private Healthcare center	4200000	92000	0	2.19048	3029	5	3	3
watch?v=jM3xVuM2Td0	3 min 43 sec	Endodontist	975	27	0	2.76923	7	8	3	4
watch?v=owoEczzhCq4	4 min 51 sec	Dentist	1100	21	0	1.90909	4	3	2	2

## Sheet: Usefullness
Usefullness index	Brushing teeth with a toothpaste twice daily, for at least 2 minutes	Tooth brushing techniques	Change your toothbrush after 3 m	Change your toothbrush after you have cold	Never share your tooth brush	After each use clean and disinfect the toothbrush	Avoid placing tooth brushes of a family in a common toothbrush holder	Brush/clean your tongue once daily	Clean between your teeth everyday with interdental brushes or floss	Use mouthwashes	Use of powered toothbrush	Diet advice	Hydration	Demo videos	Total score
watch?v=2yxa67n5JR4	1	1	1	0	0	0	0	0	1	0	0	1	1	1	7
watch?v=6r3FW_LDj8U	1	1	1	0		1	0	1	1	1	1	1	1	0	10
watch?v=6xcmQBGfphE	1	0	0	0	0	0	0	1	1	1		1	1	0	6
watch?v=AVsMmppYXrI	1	1	0	0	0	1	0	0	1	1	0	1	1	0	7
watch?v=nhzl2nFt10g	1	0	0	0	0	0	0	0	1	1	0	1	1	0	5
watch?v=4AU2Abxw-00	1	1	1	0	0	1	0	0	1	1	1	1	1	1	10
watch?v=MrfIaVs_dAQ	1	1	1	0	0	0	0	0	1	1	1	1	1	1	9
watch?v=ibwMhDQJInY	1	1	0	0	0	0	0	0	0	0	0	1	1	1	5
watch?v=VJcbGEKCQgk	1	1	1	0	0	0	0	1	1	1	1	1	1	1	10
watch?v=7k3wjTOhYwY	1	1	1	0	0	0	0	0	1	1	1	1	1	1	9
watch?v=-hR5GNqLKbc	1	1	1	1	0	1	0	1	1	1	1	1	1	1	12
watch?v=yC6qapmO9Wc	1	1	0	0	0	0	0	0	1	0	1	1	1	1	7
watch?v=4LACyvMPKwk	1	0	0	0	0	0	0	1	1	1	1	1	1	0	7
watch?v=FFq-2aA6m8Y&t=27s	1	1	1	1	1	1	0	1	1	1	1	1	1	1	13
watch?v=rU9ZvXhoZ1Q watch?v=IAR8VEmShfo	1	1	0	0	0	1	0	1	1	0	1	0	0	1	7
watch?v=IHwGztslvB8	1	1	1	0	0	0	0	1	1	1	1	1	1	1	10
watch?v=dp23sQ6MNvs&t=86s	1	1	1	0	0	0	0	1	1	1	1	1	1	1	10
watch?v=UYRO9R6Bw2s	1	1	0	0	0	0	0	0	0	0	0	1	1	1	5
watch?v=fv-EGsNvNzc	1	1	0	0	0	0	0	0	1	0	0	1	1	0	5
watch?v=9fI_hEz2oM0	1	0	0	0	0	0	0	0	0	0	0	1	1	0	3
watch?v=uAKFKIFrx58	1	0	0	0	0	0	0	0	1	0	0	1	1	0	4
watch?v=ajwIU957QHA	1	1	0	0	0	0	0	0	1	1	0	1	1	1	7
watch?v=howz59V8318	1	1	0	0	0	0	0	1	1	1	1	0	0	1	7
watch?v=UU_IfVFV6fU watch?v=f5OuzrHYQ7s	1	1	1	0	0	0	0	1	1	1	1	1	1	1	10
watch?v=fHXOPun1cOs&t=14s	1	1	0	0	0	0	0	0	0	0	0	0	0	1	3
watch?v=YEz6s71KxBs	1	1	1	0	0	1	1	1	1	1	1	0	0	0	9
watch?v=ds9sWQNHo7k watch?v=EvsrhZm98r4&t=0s	1	1	1	0	0	1	0	1	1	1	1	1	1	1	11
watch?v=vMp1l3E0h0g	1	0	0	0	0	0	1	0	1	1	0	1	1	0	6
watch?v=VJcbGEKCQgk&t=27s	1	1	1	0	0	0	0	1	1	1	1	1	1	1	10
watch?v=ylZZOeq2EPQ	0	1	0	0	0	0	0	1	1	1	0	0	0	1	5
watch?v=Oq2vQSkVQxY	1	1	0	0	0	0	0	1	1	1	1	0	0	1	7
watch?v=aFl1OwR-z0Y	1	1	0	0	0	0	0	0	1	1	1	1	1	0	7
watch?v=hqnTHyv52IQ	1	0	0	0	0	0	0	1	1	1	1	0	0	0	5
watch?v=0MTbQMwxxWk	1	0	0	0	0	0	0	0	1	1	1	0	0	1	5
watch?v=mlQhMPKJThM	1	1	0	0	0	0	0	0	1	0	0	0	0	0	3
watch?v=RWEEPSWT3mI	1	0	0	0	0	0	0	1	1	1	0	1	1	1	7
watch?v=uZWSJZD6_sM	0	0	0	0	0	0	0	1	1	1	0	1	1	0	5
watch?v=BapR9J86ZZw	1	1	0	0	0	0	0	0	0	0	0	1	1	1	5
watch?v=-b5VTkwcnkk	1	1	0	0	0	0	0	0	1	0	1	1	1	1	7
watch?v=leVF5RYj42Y watch?v=noExCv6n2oc	1	1	0	0	0	1	0	1	1	0	1	0	0	1	7
watch?v=tBDx38Mag7A	1	1	1	0	0	0	0	1	0	0	1	0	0	1	6
watch?v=6mhRTDBNQ-M watch?v=91EFqX2Czl8&t=1s	1	1	0	0	0	0	0	0	1	0	1	0	0	1	5
watch?v=sxT6Xz6T7DY watch?v=28CNn14yIvw watch?v=4P2NhkIqsqg	1	1	0	0	0	0	0	0	1	0	1	0	0	1	5
watch?v=3XtVgZ8GSP0	1	1	0	0	0	0	0	1	1	1	1	0	0	1	7
watch?v=eUZZOBBJRaI	1	1	0	0	0	1	0	1	1	1	1	0	0	1	8
watch?v=FLNUoprv0og	1	1	0	0	0	0	0	0	0	0	1	1	1	0	5
watch?v=KVOohhi3xcY	1	1	0	0	0	0	0	0	0	0	1	1	1	0	5
watch?v=tobt-klsltg	1	1	0	0	0	0	0	0	1	1	1	0	0	1	6
watch?v=621E6KyWIGA	1	1	0	0	0	0	0	1	0	0	1	0	0	1	5
watch?v=jM3xVuM2Td0	1	1	0	0	0	0	0	1	1	1	0	1	1	1	8
watch?v=owoEczzhCq4	1	1	0	0	0	0	0	0	0	0	0	0	0	1	3
		1 Bass technique
		1 modified Bass technique

## Sheet: Discern
DISCERN	Are the aims clear and achieved?	Are reliable of information used (i.e. publication cited, speaker is a board certified practitioner)?	Is the information presented balanced and unbiased?	Are additional sources of information listed for patient reference?	Are areas of uncertainty mentioned?	Total
watch?v=2yxa67n5JR4	0	1	1	0	0	2
watch?v=6r3FW_LDj8U	1	1	1	1	0	4
watch?v=6xcmQBGfphE	1	1	1	1	0	4
watch?v=AVsMmppYXrI	1	1	1	0	1	4
watch?v=nhzl2nFt10g	1	1	1	0	1	4
watch?v=4AU2Abxw-00	1	1	1	1	1	5
watch?v=MrfIaVs_dAQ	1	1	0	0	1	3
watch?v=ibwMhDQJInY	1	1	0	0	0	2
watch?v=VJcbGEKCQgk	1	1	1	0	1	4
watch?v=7k3wjTOhYwY	1	1	1	0	1	4
watch?v=-hR5GNqLKbc	1	1	0	1	1	4
watch?v=yC6qapmO9Wc	0	1	0	1	0	2
watch?v=4LACyvMPKwk	0	1	1	1	1	4
watch?v=FFq-2aA6m8Y&t=27s	1	1	1	1	1	5
watch?v=rU9ZvXhoZ1Q watch?v=IAR8VEmShfo	1	1	1	1	0	4
watch?v=IHwGztslvB8	1	1	1	1	1	5
watch?v=dp23sQ6MNvs&t=86s	1	0	1	1	1	4
watch?v=UYRO9R6Bw2s	0	0	1	0	1	2
watch?v=fv-EGsNvNzc	0	1	1	0	0	2
watch?v=9fI_hEz2oM0	0	0	1	0	0	1
watch?v=uAKFKIFrx58	0	1	1	0	0	2
watch?v=ajwIU957QHA	0	1	1	0	0	2
watch?v=howz59V8318	1	1	1	0	0	3
watch?v=UU_IfVFV6fU watch?v=f5OuzrHYQ7s	1	1	1	1	1	5
watch?v=fHXOPun1cOs&t=14s	0	0	0	0	1	1
watch?v=YEz6s71KxBs	1	0	1	0	1	3
watch?v=ds9sWQNHo7k watch?v=EvsrhZm98r4&t=0s	1	1	1	1	1	5
watch?v=vMp1l3E0h0g	1	0	1	0	0	2
watch?v=VJcbGEKCQgk&t=27s	1	1	1	0	0	3
watch?v=ylZZOeq2EPQ	0	1	1	0	0	2
watch?v=Oq2vQSkVQxY	1	1	1	0	0	3
watch?v=aFl1OwR-z0Y						0
watch?v=hqnTHyv52IQ	0	1	0	0	1	2
watch?v=0MTbQMwxxWk	0	1	0	0	0	1
watch?v=mlQhMPKJThM	0	1	1	0	0	2
watch?v=RWEEPSWT3mI	1	0	1	0	0	2
watch?v=uZWSJZD6_sM	1	0	0	1	0	2
watch?v=BapR9J86ZZw	1	1	1	0	0	3
watch?v=-b5VTkwcnkk	1	1	1	1	1	5
watch?v=leVF5RYj42Y watch?v=noExCv6n2oc	1	1	1	1	0	4
watch?v=tBDx38Mag7A	1	1	1	0	0	3
watch?v=6mhRTDBNQ-M watch?v=91EFqX2Czl8&t=1s	1	1	0	1	1	4
watch?v=sxT6Xz6T7DY watch?v=28CNn14yIvw watch?v=4P2NhkIqsqg	1	1	1	1	0	4
watch?v=3XtVgZ8GSP0	0	1	1	1	0	3
watch?v=eUZZOBBJRaI	1	1	1	1	0	4
watch?v=FLNUoprv0og	1	1	0	1	0	3
watch?v=KVOohhi3xcY	0	1	0	1	0	2
watch?v=tobt-klsltg	1	1	0	0	1	3
watch?v=621E6KyWIGA	1	1	1	0	0	3
watch?v=jM3xVuM2Td0	1	1	1	0	0	3
watch?v=owoEczzhCq4	0	1	1	0	0	2

## Sheet: GQS
GQS
watch?v=2yxa67n5JR4	3
watch?v=6r3FW_LDj8U	4
watch?v=6xcmQBGfphE	4
watch?v=AVsMmppYXrI	4
watch?v=nhzl2nFt10g	4
watch?v=4AU2Abxw-00	5
watch?v=MrfIaVs_dAQ	5
watch?v=ibwMhDQJInY	2
watch?v=VJcbGEKCQgk	5
watch?v=7k3wjTOhYwY	4
watch?v=-hR5GNqLKbc	5
watch?v=yC6qapmO9Wc	3
watch?v=4LACyvMPKwk	4
watch?v=FFq-2aA6m8Y&t=27s	5
watch?v=rU9ZvXhoZ1Q watch?v=IAR8VEmShfo	4
watch?v=IHwGztslvB8	5
watch?v=dp23sQ6MNvs&t=86s	5
watch?v=UYRO9R6Bw2s	5
watch?v=fv-EGsNvNzc	2
watch?v=9fI_hEz2oM0	2
watch?v=uAKFKIFrx58	2
watch?v=ajwIU957QHA	2
watch?v=howz59V8318	4
watch?v=UU_IfVFV6fU watch?v=f5OuzrHYQ7s	4
watch?v=fHXOPun1cOs&t=14s	5
watch?v=YEz6s71KxBs	4
watch?v=ds9sWQNHo7k watch?v=EvsrhZm98r4&t=0s	4
watch?v=vMp1l3E0h0g	3
watch?v=VJcbGEKCQgk&t=27s	3
watch?v=ylZZOeq2EPQ	4
watch?v=Oq2vQSkVQxY	3
watch?v=aFl1OwR-z0Y	4
watch?v=hqnTHyv52IQ	2
watch?v=0MTbQMwxxWk	2
watch?v=mlQhMPKJThM	2
watch?v=RWEEPSWT3mI	2
watch?v=uZWSJZD6_sM	2
watch?v=BapR9J86ZZw	3
watch?v=-b5VTkwcnkk	4
watch?v=leVF5RYj42Y watch?v=noExCv6n2oc	4
watch?v=tBDx38Mag7A	3
watch?v=6mhRTDBNQ-M watch?v=91EFqX2Czl8&t=1s	4
watch?v=sxT6Xz6T7DY watch?v=28CNn14yIvw watch?v=4P2NhkIqsqg	4
watch?v=3XtVgZ8GSP0	4
watch?v=eUZZOBBJRaI	4
watch?v=FLNUoprv0og	3
watch?v=KVOohhi3xcY	2
watch?v=621E6KyWIGA	3
watch?v=jM3xVuM2Td0	4
watch?v=owoEczzhCq4	2

## Sheet: Sheet1
Search terms						DISCERN	Are the aims clear and achieved?	Are reliable of information used (i.e. publication cited, speaker is a board certified practitioner)?	Is the information presented balanced and unbiased?	Are additional sources of information listed for patient reference?	Are areas of uncertainty mentioned?	Total
oral health for adults
dental health for adults
how to clean teeth
USEFULNESS SCORE
Score 0=Not useful
Scores 1–3=Slightly useful
Scores 4–7=Moderately useful
Scores 8–11=useful
Scores 12–14=Very useful
